# Supplementary material for: Fabrication and characterization of polymer insulated carbon nanotube modified electrochemical nanoprobes
Source: Royal Society of Chemistry journal article supplement (doi:10.1039/b9nr00281b), 2010-01-01
Supplement: b9nr00281b.pdf [file b9nr00281b.pdf]

**Supporting information:**

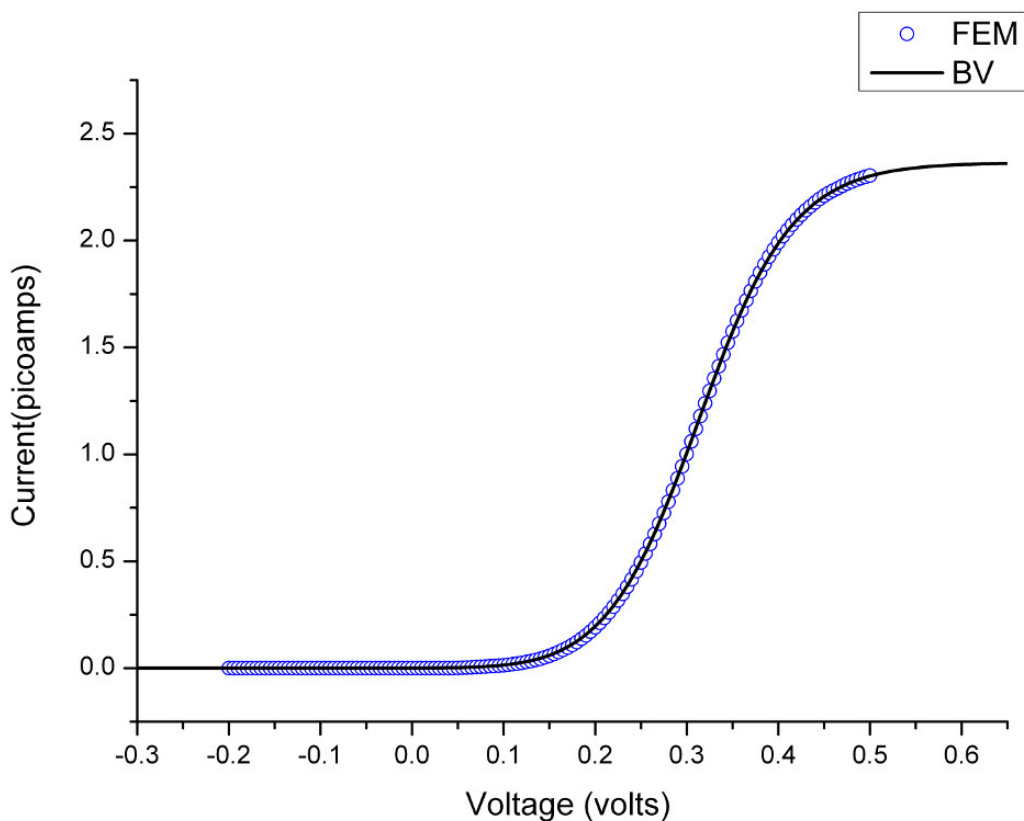

Finite Element Model predicted voltammetry response for a single potential sweep (from -0.2 V to 0.5 V) for a hemispherical electrode with radius  $R=25\text{nm}$ . The Finite Element Model(FEM) solution (blue circles) follows the behavior predicted by the Butler-Volmer equation for a one-step, one-electron process<sup>1</sup>(solid line):

$$I_{BV} = \frac{I_{mt}}{1 + e^{-\frac{F}{RT}(E-E^0)} + \frac{I_{mt}}{FAck^0} \cdot e^{-\frac{F}{RT}(1-\alpha)(E-E^0)}}$$

A is the electrode area.  $I_{mt}$  was used as the only fit parameter:  $I_{mt}=2.36\text{ pA}$ . The values of various electrochemical constants used in FEM are:  $E^0=0.219\text{ Volts}$ ,  $\alpha=0.5$ ,  $k^0=1.5\text{ cm/s}$ ,  $D_0=7.8 \times 10^{-10}\text{ m}^2/\text{s}$ ,  $T=298\text{ K}$ .

1. Heller, I.; Kong, J.; Heering, H. A.; Williams, K. A.; Lemay, S. G.; Dekker, C., Individual Single-Walled Carbon Nanotubes as Nanoelectrodes for Electrochemistry. *Nano Letters* **2005**, 5 (1), 137-142.
